# Supplementary material for: Enhanced desulfurization performance of PDMS membranes by incorporating silver decorated dopamine nanoparticles
Source: Royal Society of Chemistry journal article supplement (doi:10.1039/c4ta01778a), 2014-06-10
Supplement: c4ta01778a1.pdf [file c4ta01778a1.pdf]

## Supporting Information

### **Enhanced desulfurization performance of PDMS membranes by incorporating silver decorated dopamine nanoparticles**

Guanhua Liu<sup>a,b</sup>, Tiantian Zhou<sup>a,b</sup>, Wanpeng Liu<sup>a,b</sup>, Shen Hu<sup>a,b</sup>, Fusheng Pan<sup>a,b</sup>, Hong  
Wu<sup>a,b</sup>, Zhongyi Jiang<sup>\*a,b</sup>, Baoyi Wang<sup>c</sup>, Jing Yang<sup>c</sup> and Xingzhong Cao<sup>c</sup>

<sup>a</sup> Key Laboratory for Green Chemical Technology of Ministry of Education, School  
of Chemical Engineering and Technology, Tianjin University, Tianjin 300072, China,  
Fax: +86 22 23500086; E-mail: [zhyjiang@tju.edu.cn](mailto:zhyjiang@tju.edu.cn)

<sup>b</sup> Collaborative Innovation Center of Chemical Science and Engineering (Tianjin),  
Tianjin 300072, China, Fax: +86 22 23500086; E-mail: [zhyjiang@tju.edu.cn](mailto:zhyjiang@tju.edu.cn)

<sup>c</sup> Key Laboratory of Nuclear Radiation and Nuclear Energy Technology, Institute of  
High Energy Physics, Chinese Academy of Sciences, Beijing 100049, China, Tel: +86  
10 88235404; E-mail: [lizhx@ihep.ac.cn](mailto:lizhx@ihep.ac.cn)

\*To whom correspondence should be addressed. E-mail: [zhyjiang@tju.edu.cn](mailto:zhyjiang@tju.edu.cn)

## 1. The literature data of pervaporation desulfurization

It is necessary to compare the pervaporation performance in this study to the literature data in recent years. So pervaporation performance of pervaporative desulfurization in the literatures is listed in **Table S1**. The comprehensive properties of the permeation flux and enrichment factor in this study were superior to those in many other studies.

**Table S1.** Pervaporation desulfurization performance in the literatures.

| Membrane                               | Active layer thickness ( $\mu\text{m}$ ) | Feed                                | T ( $^{\circ}\text{C}$ ) | Permeate pressure (Pa) | Sulfur content (ppm) | Flux ( $\text{kg}/(\text{m}^2 \text{h})$ ) | Enrichment factor | Publication year | Ref.               |
|----------------------------------------|------------------------------------------|-------------------------------------|--------------------------|------------------------|----------------------|--------------------------------------------|-------------------|------------------|--------------------|
| PDMS-PEI                               | 4                                        | Thiophene / <i>n</i> -heptane       | 80                       | 200                    | 147                  | 0.8                                        | 7.6               | 2010             | <a href="#">1</a>  |
| PDMS/ceramic                           | 8                                        | Thiophene / <i>n</i> -octane        | 30                       | 210                    | 400                  | 5.37                                       | 4.22              | 2010             | <a href="#">2</a>  |
| PEG-CuY                                | -                                        | Thiophene /hydrocarbon              | 110                      | 130                    | 1190                 | 3.19                                       | 2.95              | 2010             | <a href="#">3</a>  |
| PDMS-Ag <sup>+</sup> /TiO <sub>2</sub> | 15                                       | Thiophene / <i>n</i> -octane        | 40                       | -                      | 571                  | 4.14                                       | 8.56              | 2011             | <a href="#">4</a>  |
| PDMS-Ag <sup>+</sup> /SiO <sub>2</sub> | 13-16                                    | Thiophene / <i>n</i> -octane        | -                        | 330                    | 495                  | 7.76                                       | 4.3               | 2012             | <a href="#">5</a>  |
| PEG-b-PAN                              | 10                                       | Thiophene / <i>n</i> -heptane       | 82                       | -                      | 1000                 | 0.189                                      | 2.82              | 2012             | <a href="#">6</a>  |
| PTFEP                                  | 13-16                                    | Thiophene /heptane                  | 85                       | 300                    | 400                  | 0.089                                      | 9.7               | 2012             | <a href="#">7</a>  |
| EC/C <sub>60</sub>                     | -                                        | five-component mixture <sup>a</sup> | 75                       | -                      | 300                  | 2.73                                       | 5.03              | 2012             | <a href="#">8</a>  |
| PDMS-SiO <sub>2</sub>                  | -                                        | Thiophene / <i>n</i> -octane        | 30                       | -                      | 500                  | 7.36                                       | 4.98              | 2012             | <a href="#">9</a>  |
| PDMS-dopamine/Cu                       | 16.0-23.0                                | Thiophene / <i>n</i> -octane        | 30                       | -                      | 570                  | 7.42                                       | 4.81              | 2013             | <a href="#">10</a> |
| Cl-PBPP                                | 12.4                                     | Thiophene                           | 85                       | 300 Pa                 | 400                  | 1.38                                       | 5.6               | 2013             | <a href="#">11</a> |

|                                    |               |                                       |     |               |      |      |      |      |                    |
|------------------------------------|---------------|---------------------------------------|-----|---------------|------|------|------|------|--------------------|
|                                    |               | /heptane                              |     |               |      |      |      |      |                    |
| CuO/AMPSF                          | 20            | Thiophene<br>/n-heptane               | 40  | <800 Pa       | 1500 | 1.2  | 3.9  | 2013 | <a href="#">12</a> |
| PEBAX<br>/PVDF                     | 11            | Thiophene<br>/n-heptane               | 40  | 500 Pa        | 381  | 3.8  | 4.0  | 2014 | <a href="#">13</a> |
| Copolyimide-<br>/glycidyl-<br>POSS | 28-32         | Benzothio<br>phene<br>/n-<br>dodecane | 100 | 19-30<br>mbar | 3000 | 1.1  | 2.41 | 2014 | <a href="#">14</a> |
| PMePP/Mn                           | 15            | Thiophene<br>/<br>n-heptane           | 85  | <300 Pa       | 294  | 2.1  | 6.5  | 2014 | <a href="#">15</a> |
| PDMS-<br>DAAg                      | 16.0-<br>25.0 | Thiophene<br>/n-octane                | 30  | -             | 500  | 8.22 | 5.03 |      | This<br>study      |

<sup>a</sup>Mixture consists of *n*-heptane, cyclohexane, cyclohexene, toluene, and thiophene.

## References:

1. J. Chen, J. Li, R. Qi, H. Ye and C. Chen, *Appl Biochem Biotechnol*, 2010, **160**, 486.
2. R. Xu, G. Liu, X. Dong, Wanqin and Jin, *Desalination*, 2010, **258**, 106.
3. L. Lin, Y. Zhang and H. Li, *J Colloid Interface Sci*, 2010, **350**, 355.
4. W. Liu, B. Li, R. Cao, Z. Jiang, S. Yu, G. Liu and H. Wu, *Journal of Membrane Science*, 2011, **378**, 382.
5. R. Cao, X. Zhang, H. Wu, J. Wang, X. Liu and Z. Jiang, *J Hazard Mater*, 2011, **187**, 324.
6. F. Lu, Y. Kong, H. Lv and J. Yang, *Petroleum Science and Technology*, 2012, **30**, 1232.
7. Z. Yang, W. Zhang, J. Li and J. Chen, *Separation and Purification Technology*, 2012, **93**, 15.
8. S. Sha, Y. Kong and J. Yang, *Journal of Membrane Science*, 2012, **415-416**, 835.
9. B. Li, W. Liu, H. Wu, S. Yu, R. Cao and Z. Jiang, *Journal of Membrane Science*, 2012, **415-416**, 278.
10. W. Liu, Y. Li, X. Meng, G. Liu, S. Hu, F. Pan, H. Wu, Z. Jiang, B. Wang, Z. Li and X. Cao, *Journal of Materials Chemistry A*, 2013, **1**, 3713.
11. Z.-J. Yang, Z.-Q. Wang, J. Li and J.-X. Chen, *Separation and Purification Technology*, 2013, **109**, 48.
12. Y. Xia, G. L. Han, Q. G. Zhang, Y. Gong, I. Broadwell and Q. L. Liu, *Journal of Applied Polymer Science*, 2013, **130**, 3718.
13. K. Liu, C.-J. Fang, Z.-Q. Li and M. Young, *Journal of Membrane Science*, 2014, **451**, 24.
14. R. Konietzny, T. Koschine, K. Rätzke and C. Staudt, *Separation and Purification Technology*, 2014, **123**, 175.
15. Z. Yang, W. Zhang, T. Wang and J. Li, *Journal of Membrane Science*, 2014, **454**, 463.

## 2. Long-term operation stability of the membrane

The long-term operation stability is a vital index to confirm the potential of the membranes for practical application. The PDMS control and PDMS-DAAg/5 membrane were used to perform the long-term operation test for a feed of 500 ppmw sulfur in *n*-octane at around 30 °C with a flow rate of 40 L/h. As shown in **Figure S1**, the active layer of PDMS control membrane was damaged after 144 h. The enrichment factor was approximate 1 at 144 h, which suggested thiophene and *n*-octane permeated through the membrane without significant difference. At around 168 h, part of the active layer peeled from the PSF substrate, so no data obtained afterwards. While the permeation flux and enrichment factor of PDMS-DAAg/5 membrane did not obviously decrease during the entire test for more than 190 h. Therefore, the stability of the PDMS-DAAg/5 membranes was favorable for pervaporation desulfurization.

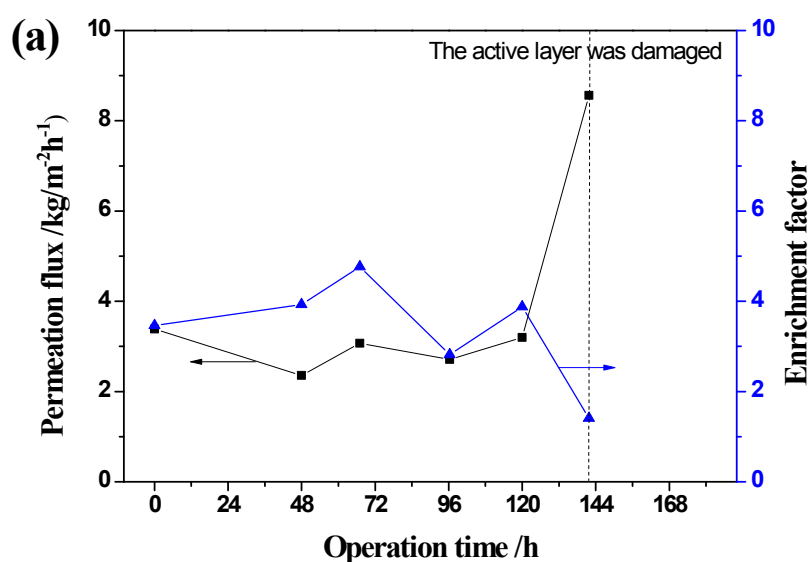

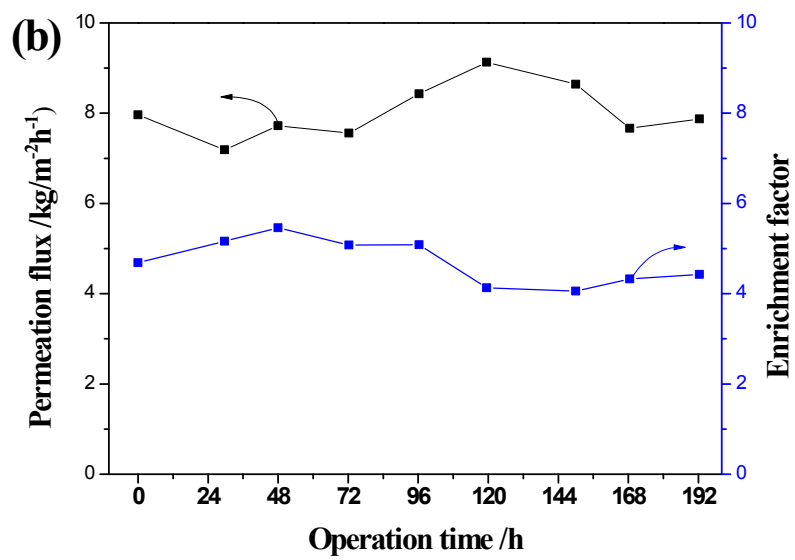

**Figure S1.** Long-term operation test of (a) PDMS control membrane and (b) PDMS-DAAg/5 membranes.
